# Supplementary material for: Synthesis and characterization of three amino-functionalized metal–organic frameworks based on the 2-aminoterephthalic ligand
Source: Royal Society of Chemistry journal article supplement (doi:10.1039/c4dt03927k), 2015-01-01
Supplement: c4dt03927k1.pdf [file c4dt03927k1.pdf]

## Synthesis and characterization of three amino-functionalized metal-organic frameworks based on 2-Aminoterephthalic ligand

---

**Ying Yang,<sup>a</sup> Rijia Lin,<sup>a</sup> Lei Ge,<sup>a\*</sup> Lei Hou,<sup>b</sup> Paul Bernhardt,<sup>c</sup> Thomas Rufford,<sup>a</sup> Shaobin Wang,<sup>d</sup> Victor Rudolph,<sup>a</sup> Yaoyu Wang,<sup>b</sup> Zhonghua Zhu<sup>a\*</sup>**

<sup>a</sup> *School of Chemical Engineering, The University of Queensland, Brisbane 4072 Australia*

<sup>b</sup> *College of Chemistry & Materials Science, Northwest University, Xi'an 710069, China*

<sup>c</sup> *School of Chemistry and Molecular Biosciences, The University of Queensland, Brisbane 4072 Australia*

<sup>d</sup> *Department of Chemical Engineering, Curtin University, GPO Box U1987, Perth, WA 6845, Australia*

### **SUPPORTING INFORMATION**

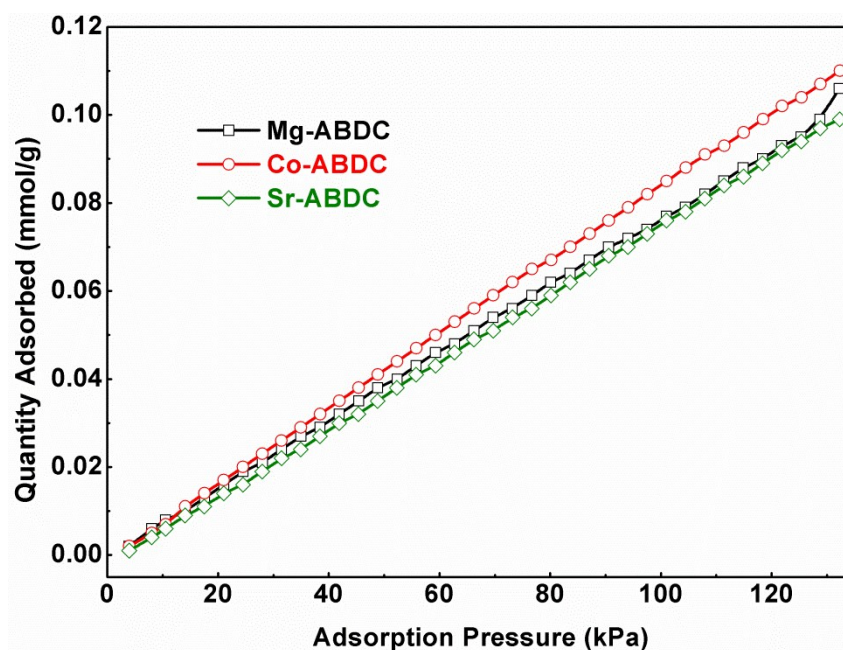

Fig. S1 N<sub>2</sub> adsorption at 25 °C on M-ABDC (M = Mg, Co, Sr)

Table S1 Langmuir constants of CO<sub>2</sub> and N<sub>2</sub> adsorption at 0 °C and selectivity of CO<sub>2</sub>/N<sub>2</sub> on M-ABDC<sup>a</sup>

| Samples | CO <sub>2</sub>   |                            | N <sub>2</sub>    |                            | Selectivity of CO <sub>2</sub> /N <sub>2</sub> |
|---------|-------------------|----------------------------|-------------------|----------------------------|------------------------------------------------|
|         | $q_{m1}$ (mmol/g) | $b_1$ (kPa <sup>-1</sup> ) | $q_{m2}$ (mmol/g) | $b_1$ (kPa <sup>-1</sup> ) |                                                |
| Mg-ABDC | 2.022             | 0.0151                     | 17.24             | 4.47E-06                   | 396                                            |
| Co-ABDC | 1.536             | 0.0179                     | 13.14             | 6.41E-06                   | 326                                            |
| Sr-ABDC | 285.53            | 4.66E-06                   | 51.84             | 1.44E-06                   | 18                                             |

<sup>a</sup> Langmuir equation:  $q = \frac{q_m b p}{1 + b p}$ ; The adsorption equilibrium selectivity:

$$S_{CO_2/N_2} = \frac{x_1}{x_2} \times \frac{y_1}{y_2} \approx \frac{q_{m1} b_1}{q_{m2} b_2}$$

## CO<sub>2</sub>/N<sub>2</sub> selectivity prediction via IAST

This method was following the procedures in the reporting references.<sup>1,2</sup> The experimental adsorption data for pure CO<sub>2</sub> and N<sub>2</sub> (measured at 0 °C) were fitted using a Langmuir-Freundlich (L-F) model:

$$q_i = \frac{a \times b \times p_i^{1/n}}{1 + b \times p_i^{1/n}}$$

Where  $q_i$  adsorbed amounts at pressure and  $p_i$ .

The adsorption selectivities for binary mixtures of CO<sub>2</sub>/N<sub>2</sub> were calculated using the Ideal Adsorption Solution Theory (IAST), which was reported by Myers and Prausnitz.<sup>1</sup> And the selectivity was defined by:

$$S_{i/j} = \frac{x_i \times y_j}{x_j \times y_i}$$

Where  $x_i$  is the mole fraction of component i in the adsorbed phase and  $y_i$  is the mole fraction of component i in the bulk.

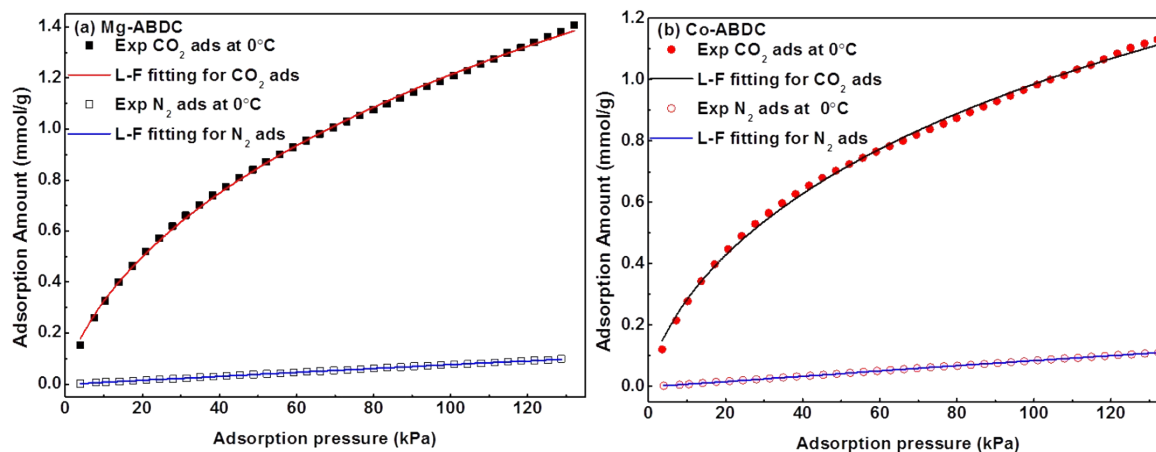

**Fig. S2** CO<sub>2</sub> and N<sub>2</sub> adsorption isotherms at 0 °C and fitting by L-F model

**Table S2** Fitting parameter of CO<sub>2</sub> and N<sub>2</sub> adsorption data by L-F model

| L-F model fitting parameter |                     | a       | b       | n       | Chi <sup>2</sup> | R <sup>2</sup> |
|-----------------------------|---------------------|---------|---------|---------|------------------|----------------|
| Mg-ABDC                     | CO <sub>2</sub> ads | 4.33649 | 0.01709 | 1.47436 | 0.0001           | 0.99919        |
|                             | N <sub>2</sub> ads  | 0.84485 | 0.00073 | 0.93764 | 2.0336E-7        | 0.99977        |
| Co-ABDC                     | CO <sub>2</sub> ads | 3.04922 | 0.02229 | 1.50271 | 0.00016          | 0.99795        |

|                    |         |         |         |           |         |
|--------------------|---------|---------|---------|-----------|---------|
| N <sub>2</sub> ads | 0.68623 | 0.00087 | 0.90620 | 1.3745E-7 | 0.99988 |
|--------------------|---------|---------|---------|-----------|---------|

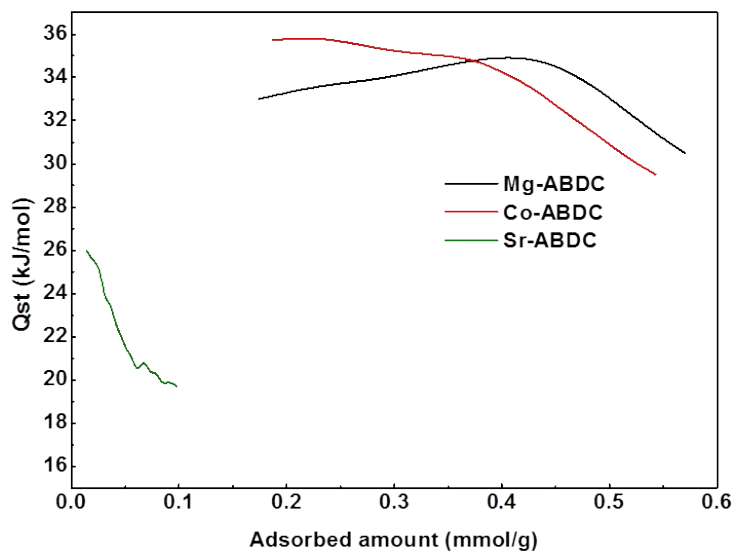

**Fig. S3** Isothermic heats of CO<sub>2</sub> adsorption calculated by Clausius-Clapeyron equation based on adsorption isotherms at 0 °C and 25 °C

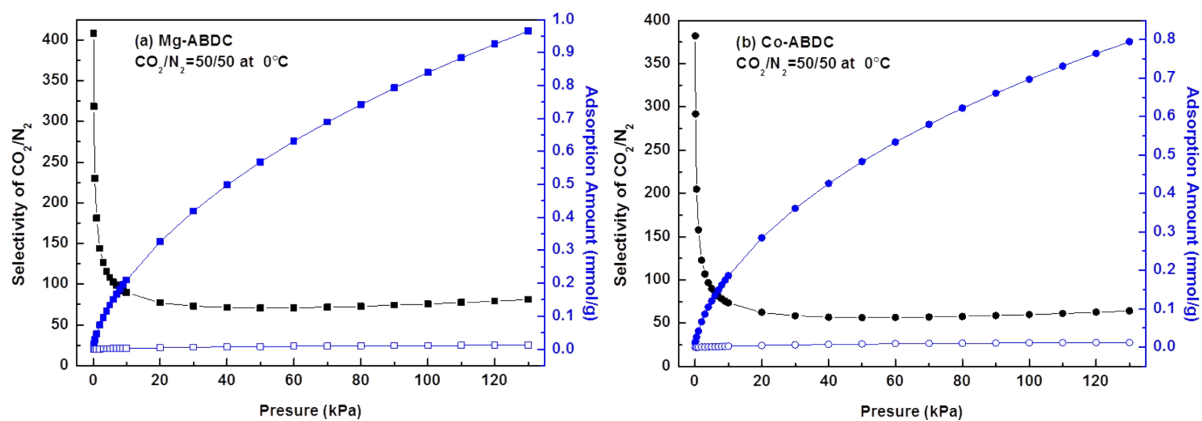

**Fig. S4** IAST adsorption isotherms of CO<sub>2</sub>+N<sub>2</sub> mixture at 50/50 and selectivities of Mg-ABDC and Co-ABDC



**Table S3** Comparison of the adsorption capacity and selectivity with some reported MOFs containing LBSs or/and OMSs

| Material                      | Features           | BET surface area (cm <sup>2</sup> /g) | CO <sub>2</sub> adsorbed amount (mmol/g) | Adsorption conditions | Selectivity of CO <sub>2</sub> /N <sub>2</sub> | References |
|-------------------------------|--------------------|---------------------------------------|------------------------------------------|-----------------------|------------------------------------------------|------------|
| Mg-ABDC                       | LBSs and OMSs      | 63                                    | 1.4                                      | 1.0 bar&298 K         | >70 <sup>a</sup>                               | This work  |
| Co-ABDC                       | LBSs and OMSs      | 71                                    | 1.1                                      | 1.0 bar&298 K         | >55 <sup>a</sup>                               | This work  |
| IRMOF-3                       | LBSs               | 2160                                  | 1.2                                      | 1.1 bar&298 K         |                                                | <u>3</u>   |
| Uio-66(Zr)-NH <sub>2</sub>    | LBSs               | 1112                                  | 1.8                                      | 1.0 bar&303 K         |                                                | <u>4</u>   |
| [CuL <sub>4</sub> ]           | LBSs               | 810                                   | 4.95                                     | 1.0 bar&298 K         |                                                | <u>5</u>   |
| NH <sub>2</sub> -MIL-53(Al)   | LBSs and breathing |                                       | 7.2                                      | 24 bar&283 K          | 12 <sup>c</sup>                                | <u>6</u>   |
| CAU-1                         | LBSs               | 1268                                  | 7.2                                      | 1 bar&273 K           | 101 <sup>b</sup>                               | <u>7</u>   |
| Cu-BTC                        | OMSs               | 1571                                  | 12.7                                     | 15 bar&298 K          | 5.1 <sup>b</sup>                               | <u>8</u>   |
| Cu-BTC (hydrated 4 wt%)       | OMSs               | 1492(Langmuir)                        | 11.36                                    | 4.8 bar&298 K         | 28 <sup>a</sup>                                | <u>9</u>   |
| Cu-TDPAT                      | LBSs and OMSs      | 1938                                  | 5.89                                     | 1.0 bar&298 K         | ~79 <sup>a</sup>                               | <u>10</u>  |
| CuBTTri                       | OMSs               | 345                                   | 1.27                                     | 1.0 bar&298 K         | 25 <sup>c</sup>                                | <u>11</u>  |
| mmen-CuBTTri                  | LBS                | 870                                   | 2.38                                     | 1.0 bar&298 K         | 327 <sup>a</sup>                               | <u>12</u>  |
| Cu <sub>3</sub> (bte)[PCN-61] | OMSs               | 3350                                  | 21.4                                     | 20 bar&298 K          | 20 <sup>a</sup>                                | <u>13</u>  |
| Cu <sub>3</sub> (tpbtm)       | OMSs               | 3160                                  | 23.5                                     | 20 bar&298 K          | 33 <sup>a</sup>                                | <u>13</u>  |
| Ni <sub>2</sub> (dhtp)        | OMSs               | 1218                                  | 1.1                                      | 1.0 bar&298 K         | 7 <sup>c</sup>                                 | <u>14</u>  |
| ZTF-1                         | LBS                | 355.3                                 | 5.6                                      | 1.0 bar&273 K         | 10 <sup>c</sup>                                | <u>15</u>  |
| Cd-ANIC-1                     | LBS                | 329.3                                 | 4.72                                     | 1.0 bar&273 K         |                                                | <u>16</u>  |
| Co-ANIC-1                     | LBS                | 274.0                                 | 4.22                                     | 1.0 bar&273 K         |                                                | <u>16</u>  |

Selectivity calculation: a, from IAST; b, from slopes of adsorption isotherms at low pressure; c,  $S=q_1/q_2$  (where component 1 is more adsorbed).

15 T. Panda, P. Pachfule, Y. Chen, J. Jiang and R. Banerjee, *Chem. Commun.*, 2011, 47, 2011-2013.

16 P. Pachfule, Y. Chen, J. Jiang and R. Banerjee, *J. Mater. Chem.*, 2011, 21, 17737-17745.

## Reference

- 1 A. L. Myers and J. M. Prausnitz, *AIChE J.* , 1965, 11, 121-127.
- 2 L.-Y. Du, W.-J. Shi, L. Hou, Y.-Y. Wang, Q.-Z. Shi and Z. Zhu, *Inorg. Chem.* , 2013, 52, 14018-14027.
- 3 A. R. Millward and O. M. Yaghi, *J. Am. Chem. Soc.* , 2005, 127, 17998-17999.
- 4 Q. Yang, A. D. Wiersum, P. L. Llewellyn, V. Guillerm, C. Serre and G. Maurin, *Chem. Commun.*, 2011, 47, 9603-9605.
- 5 S. M. Zhang, Z. Chang, T. L. Hu and X. H. Bu, *Inorg. Chem.* , 2010, 49, 11581-11586.
- 6 E. Stavitski, E. A. Pidko, J. Denayer, S. Couck, E. J. M. Hensen, T. Remy, B. M. Weckhuysen, J. Gascon and F. Kapteijn, *Langmuir*, 2011, 27, 3970-3976.
- 7 X. Si, C. Jiao, F. Li, J. Zhang, S. Wang, S. Liu, Z. Li, L. Sun, F. Xu, Z. Gabelica and C. Schick, *Energy Environ. Sci.* , 2011, 4, 4522-4527.
- 8 Z. Liang, M. Marshall and A. L. Chaffee, *Energy Fuels* 2009, 23, 2785-2789.
- 9 A. O. z. r. Yazaydin, A. I. Benin, S. A. Faheem, P. Jakubczak, J. J. Low, R. R. Willis and R. Q. Snurr, *Chem. Mater.* , 2009, 21, 1425-1430.
- 10 B. Li, Z. Zhang, Y. Li, K. Yao, Y. Zhu, Z. Deng, F. Yang, X. Zhou, G. Li, H. Wu, N. Nijem, Y. J. Chabal, Z. Lai, Y. Han, Z. Shi, S. Feng and J. Li, *Angew. Chem. Int. Ed.* , 2012, 51, 1412-1415.
- 11 A. Demessence, D. M. D'Alessandro, M. L. Foo and J. R. Long, *J. Am. Chem. Soc.* , 2009, 131, 8784-8786.
- 12 T. M. McDonald, D. M. D'Alessandro, R. Krishna and J. R. Long, *Chemical Science*, 2011, 2, 2022-2028.
- 13 B. Zheng, J. Bai, J. Duan, L. Wojtas and M. J. Zaworotko, *J. Am. Chem. Soc.* , 2010, 133, 748-751.
- 14 P. D. C. Dietzel, V. Besikiotis and R. Blom, *J. Mater. Chem.* , 2009, 19, 7362-7370.
